# Supplementary material
Source: ML conference proceedings conference paper supplement (https://openaccess.thecvf.com/content/cvpr_2016/html/Yang_On_Benefits_of_2016_CVPR_paper.html)
Supplement: Supplementary file 1 [file Yang_On_Benefits_of_2016_CVPR_supplemental.pdf]

## Supplemental Materials

### Proof to Lemma 1

*Proof.* Denote  $\text{supp}(\mathbf{P}_{\Omega(\infty, \mathbf{t})}(\mathbf{w}))$  and  $\text{supp}(\mathbf{P}_{\Omega(s, \mathbf{t})}(\mathbf{w}))$  by  $A$  and  $B$  respectively for short. We first prove  $B \subseteq A$ .

Suppose  $B \not\subseteq A$ , then we can find an element  $b \in B$  but  $b \notin A$ . Without the loss of generality, we assume that  $b$  is in a certain group  $g$ . Since  $A \cap g$  contains the indices of the  $\mathbf{t}_g$  largest (magnitude) elements of group  $g$ , there exists at least one element  $a \in A \cap g$  and  $a \notin B \cap g$  (otherwise  $|B \cap g| \geq \mathbf{t}_g + 1$ ). Replacing  $b$  by  $a$  in  $B$ , the constraints are still satisfied, but we can get a better solution since  $|\mathbf{w}_a| > |\mathbf{w}_b|$ . This contradicts  $B = \text{supp}(\mathbf{P}_{\Omega(s, \mathbf{t})}(\mathbf{w}))$ .

Because we already know  $B \subseteq A$ , we can construct  $B$  by selecting the  $A$ 's elements corresponding to the largest  $s$  (magnitude) elements. Therefore,  $\text{supp}(\mathbf{P}_{\Omega(s, \mathbf{t})}(\mathbf{w})) = \text{supp}(\mathbf{P}_{\Omega(s, \infty)}(\mathbf{P}_{\Omega(\infty, \mathbf{t})}(\mathbf{w})))$ , which proves Lemma 1.  $\square$

**Lemma 5.**  $\forall \text{supp}(\mathbf{w} - \bar{\mathbf{w}}) \subseteq S, S \in \Omega(s, \mathbf{t})$ , if  $2\eta - \eta^2 \rho_+(s, \mathbf{t}) > 0$ , then

$$\|\mathbf{w} - \bar{\mathbf{w}} - \eta[\nabla f(\mathbf{w}) - \nabla f(\bar{\mathbf{w}})]_S\|^2 \leq (1 - 2\eta\rho_-(s, \mathbf{t}) + \eta^2\rho_-(s, \mathbf{t})\rho_+(s, \mathbf{t}))\|\mathbf{w} - \bar{\mathbf{w}}\|^2. \quad (6)$$

*Proof.*

$$\begin{aligned} & \|\mathbf{w} - \bar{\mathbf{w}} - \eta[\nabla f(\mathbf{w}) - \nabla f(\bar{\mathbf{w}})]_S\|^2 \\ &= \|\mathbf{w} - \bar{\mathbf{w}}\|^2 + \eta^2 \|\nabla f(\mathbf{w}) - \nabla f(\bar{\mathbf{w}})\|_S^2 - 2\eta \langle \mathbf{w} - \bar{\mathbf{w}}, [\nabla f(\mathbf{w}) - \nabla f(\bar{\mathbf{w}})]_S \rangle \\ &\leq \|\mathbf{w} - \bar{\mathbf{w}}\|^2 + (\eta^2 \rho_+(s, \mathbf{t}) - 2\eta) \langle \mathbf{w} - \bar{\mathbf{w}}, [\nabla f(\mathbf{w}) - \nabla f(\bar{\mathbf{w}})]_S \rangle \\ &\leq \|\mathbf{w} - \bar{\mathbf{w}}\|^2 - (2\eta - \eta^2 \rho_+(s, \mathbf{t})) \rho_-(s, \mathbf{t}) \|\mathbf{w} - \bar{\mathbf{w}}\|^2 \\ &= (1 - 2\eta\rho_-(s, \mathbf{t}) + \eta^2 \rho_+(s, \mathbf{t}) \rho_-(s, \mathbf{t})) \|\mathbf{w} - \bar{\mathbf{w}}\|^2. \end{aligned}$$

It completes the proof.  $\square$

### Proof to Theorem 2

*Proof.* Let us prove the first claim.

$$\begin{aligned} & \|\mathbf{w}^{k+1} - (\mathbf{w}^k - \eta \nabla f(\mathbf{w}^k))\|^2 \\ &= \|\mathbf{w}^{k+1} - \bar{\mathbf{w}}\|^2 + \|\bar{\mathbf{w}} - (\mathbf{w}^k - \eta \nabla f(\mathbf{w}^k))\|^2 + 2 \langle \mathbf{w}^{k+1} - \bar{\mathbf{w}}, \bar{\mathbf{w}} - (\mathbf{w}^k - \eta \nabla f(\mathbf{w}^k)) \rangle \end{aligned}$$

Define  $\bar{\Omega} = \text{supp}(\bar{\mathbf{w}})$ ,  $\Omega_{k+1} = \text{supp}(\mathbf{w}^{k+1})$ , and  $\bar{\Omega}_{k+1} = \bar{\Omega} \cup \Omega_{k+1}$ . From  $\|\mathbf{w}^{k+1} - (\mathbf{w}^k - \eta \nabla f(\mathbf{w}^k))\|^2 \leq \|\bar{\mathbf{w}} - (\mathbf{w}^k - \eta \nabla f(\mathbf{w}^k))\|^2$ , we have

$$\begin{aligned} \|\mathbf{w}^{k+1} - \bar{\mathbf{w}}\|^2 &\leq 2 \langle \mathbf{w}^{k+1} - \bar{\mathbf{w}}, \mathbf{w}^k - \eta \nabla f(\mathbf{w}^k) - \bar{\mathbf{w}} \rangle \\ &= 2 \langle \mathbf{w}^{k+1} - \bar{\mathbf{w}}, [\mathbf{w}^k - \eta \nabla f(\mathbf{w}^k) - \bar{\mathbf{w}}]_{\bar{\Omega}_{k+1}} \rangle \\ &\leq 2 \|\mathbf{w}^{k+1} - \bar{\mathbf{w}}\| \|[\mathbf{w}^k - \eta \nabla f(\mathbf{w}^k) - \bar{\mathbf{w}}]_{\bar{\Omega}_{k+1}}\|. \end{aligned}$$

It follows

$$\begin{aligned} \|\mathbf{w}^{k+1} - \bar{\mathbf{w}}\| &\leq 2 \|[\mathbf{w}^k - \eta \nabla f(\mathbf{w}^k) - \bar{\mathbf{w}}]_{\bar{\Omega}_{k+1}}\| \\ &= 2 \|[\mathbf{w}^k - \eta \nabla f(\mathbf{w}^k) - \bar{\mathbf{w}} + \eta \nabla f(\bar{\mathbf{w}}) - \eta \nabla f(\bar{\mathbf{w}})]_{\bar{\Omega}_{k+1}}\| \\ &\leq 2 \|[\mathbf{w}^k - \eta \nabla f(\mathbf{w}^k) - \bar{\mathbf{w}} + \eta \nabla f(\bar{\mathbf{w}})]_{\bar{\Omega}_{k+1}}\| + 2\eta \|[\nabla f(\bar{\mathbf{w}})]_{\bar{\Omega}_{k+1}}\| \\ &\leq 2 \|[\mathbf{w}^k - \eta \nabla f(\mathbf{w}^k) - \bar{\mathbf{w}} + \eta \nabla f(\bar{\mathbf{w}})]_{\bar{\Omega}_{k+1} \cup \Omega_k}\| + 2\eta \|[\nabla f(\bar{\mathbf{w}})]_{\bar{\Omega}_{k+1}}\| \\ &= 2 \|[\mathbf{w}^k - \bar{\mathbf{w}} - \eta[\nabla f(\mathbf{w}^k) - \nabla f(\bar{\mathbf{w}})]_{\bar{\Omega}_{k+1} \cup \Omega_k}\| + 2\eta \|[\nabla f(\bar{\mathbf{w}})]_{\bar{\Omega}_{k+1}}\|. \end{aligned}$$

From the inequality of Lemma 5, we have

$$\begin{aligned}
\|\mathbf{w}^{k+1} - \bar{\mathbf{w}}\| &\leq \alpha \|\mathbf{w}^k - \bar{\mathbf{w}}\| + 2\eta \|\nabla f(\bar{\mathbf{w}})\|_{\bar{\Omega}_{k+1}} \\
&\leq \alpha \|\mathbf{w}^k - \bar{\mathbf{w}}\| + 2\eta \max_j \|\nabla f(\bar{\mathbf{w}})\|_{\bar{\Omega}_{j+1}} \\
&\leq \alpha \|\mathbf{w}^k - \bar{\mathbf{w}}\| + 2\eta \Delta.
\end{aligned} \tag{7}$$

Since  $\Delta$  is constant, using the recursive relation of (7), we have

$$\begin{aligned}
\|\mathbf{w}^k - \bar{\mathbf{w}}\| &\leq \alpha^k \|\mathbf{w}^0 - \bar{\mathbf{w}}\| + 2\eta \Delta \sum_{i=0}^{k-1} \alpha^i \\
&= \alpha^k \|\mathbf{w}^0 - \bar{\mathbf{w}}\| + 2\eta \Delta \frac{1 - \alpha^k}{1 - \alpha} \\
&\leq \alpha^k \|\mathbf{w}^0 - \bar{\mathbf{w}}\| + 2\eta \Delta \frac{1}{1 - \alpha}.
\end{aligned} \tag{8}$$

Then we move to (2), when  $k \geq \lceil \log \frac{2\Delta}{(1-\alpha)\rho_+(3s, 3t)\|\mathbf{w}^0 - \bar{\mathbf{w}}\|} / \log \alpha \rceil$ , from the conclusion of (1), we have

$$\|\mathbf{w}^k - \bar{\mathbf{w}}\|_\infty \leq \|\mathbf{w}^k - \bar{\mathbf{w}}\| \leq \frac{4\Delta}{(1-\alpha)\rho_+(3s, 3t)}. \tag{9}$$

For any  $j \in \bar{\Omega}$ ,

$$\begin{aligned}
\|\mathbf{w}^k - \bar{\mathbf{w}}\|_\infty &\geq |[\mathbf{w}^k - \bar{\mathbf{w}}]_j| \\
&\geq -|[\mathbf{w}^k]_j| + |[\bar{\mathbf{w}}]_j|.
\end{aligned}$$

So

$$\begin{aligned}
|[\mathbf{w}^k]_j| &\geq |[\bar{\mathbf{w}}]_j| - \|\mathbf{w}^k - \bar{\mathbf{w}}\|_\infty \\
&\geq |[\bar{\mathbf{w}}]_j| - \frac{4\Delta}{(1-\alpha)\rho_+(3s, 3t)}.
\end{aligned}$$

Therefore,  $[\mathbf{w}^k]_j$  is non-zero if  $|[\bar{\mathbf{w}}]_j| > \frac{4\Delta}{(1-\alpha)\rho_+(3s, 3t)}$ , and (2) is proved.  $\square$

**Lemma 6.** *The value of  $\Delta$  is bounded by*

$$\Delta \leq \min \left( O \left( \sqrt{\frac{s \log p + \log 1/\eta'}{n}} \right), O \left( \sqrt{\frac{\max_{g \in \mathcal{G}} \log |g| \sum_{g \in \mathcal{G}} \mathbf{t}_g + \log 1/\eta'}{n}} \right) \right), \tag{10}$$

with high probability  $1 - \eta'$ .

*Proof.* We introduce the following notation for matrix and it is different from the vector notation. For a matrix  $X$  in  $\mathbb{R}^{n \times p}$ ,  $X_h$  will be a  $\mathbb{R}^{n \times |h|}$  matrix that only keep the columns corresponding to the index set  $h$ . Here we restrict  $h$  by  $\mathbf{w}_h \in \Omega(s, \mathbf{t})$  for any  $\mathbf{w} \in \mathbb{R}^p$ . We denote  $\Sigma_h = X_h^\top X_g$ . For the theorem, we can first show that  $\|X_h^\top \epsilon\| \leq \sqrt{n} \left( \sqrt{|h|} + \sqrt{2\rho_+(2s, 2\mathbf{t}) \log(\frac{1}{\eta})} \right)$  with probability  $1 - \eta$ . To this end, we have to point out that our columns of  $X$  are normalized to  $\sqrt{n}$  and hence  $X_h^\top \epsilon$  will be a  $\frac{p}{m}$ -variate Gaussian random variable with  $n$  on the diagonal of covariance matrix. We further use  $\lambda_i$  as the eigenvalues of  $\Sigma_h$  with decreasing order, i.e.,  $\lambda_1$  being the largest, or equivalently,  $\lambda_1 = \|\Sigma_h\|_{spec}$ .

Also, using the trick that  $\text{tr}(\Sigma_h^2) = \lambda_1^2 + \lambda_2^2 + \dots + \lambda_{|h|}^2$  and Proposition 1.1 from [16], we have

$$\begin{aligned} e^{-t} &\geq \Pr \left( \|X_h^\top \epsilon\|^2 > \sum_{i=1}^{|h|} \lambda_i + 2\sqrt{\sum_{i=1}^{|h|} \lambda_i^2 t + 2\lambda_1 t} \right) \\ &\geq \Pr \left( \|X_h^\top \epsilon\|^2 > \sum_{i=1}^{|h|} \lambda_i + 2\sqrt{2 \sum_{i=1}^{|h|} \lambda_i \lambda_1 t + 2\lambda_1 t} \right) \\ &\geq \Pr \left( \|X_h^\top \epsilon\| \geq \sqrt{\sum_{i=1}^{|h|} \lambda_i + \sqrt{2\lambda_1 t}} \right). \end{aligned}$$

Substitute  $t$  with  $\log(\frac{1}{\eta})$  and the facts that  $\sum_{i=1}^{|h|} \lambda_i = |h|n$  and  $\lambda_1 = \|\Sigma\|_{\text{spec}} \leq n\rho_+(2s, 2\mathbf{t})$ , we have

$$\|X_h^\top \epsilon\| \leq \sqrt{n} \left( \sqrt{|h|} + \sqrt{2\rho_+(2s, 2\mathbf{t}) \log(1/\eta)} \right)$$

with probability  $1 - \eta$ .

For the least square loss, we have  $\nabla f(\bar{\mathbf{w}}) = \frac{1}{n} X^\top (X\bar{\mathbf{w}} - y) = \frac{1}{n} X^\top \epsilon$ . To estimate the upper bound of  $\|\mathbf{P}_{\Omega(2s, 2\mathbf{t})}(\nabla f(\bar{\mathbf{w}}))\|$ , we use the following fact

$$\|\mathbf{P}_{\Omega(2s, 2\mathbf{t})}(\nabla f(\bar{\mathbf{w}}))\| = \|\mathbf{P}_{\Omega(2s, 2\mathbf{t})}(X^\top \epsilon)\| \leq \min(\|\mathbf{P}_{\Omega(2s, \infty)}(X^\top \epsilon)\|, \|\mathbf{P}_{\Omega(\infty, 2\mathbf{t})}(X^\top \epsilon)\|).$$

We consider the upper bounds of  $\|\mathbf{P}_{\Omega(2s, \infty)}(X^\top \epsilon)\|$  and  $\|\mathbf{P}_{\Omega(\infty, 2\mathbf{t})}(X^\top \epsilon)\|$  respectively:

$$\begin{aligned} &\Pr \left( \|\mathbf{P}_{\Omega(2s, \infty)}(X^\top \epsilon)\| \geq n^{-1/2} \left( \sqrt{2s} + \sqrt{2\rho_+(2s, 2\mathbf{t}) \log(1/\eta)} \right) \right) \\ &= \Pr \left( \max_{|h|=2s} \|X_h^\top \epsilon\| \geq n^{-1/2} \left( \sqrt{2s} + \sqrt{2\rho_+(2s, 2\mathbf{t}) \log(1/\eta)} \right) \right) \\ &\leq \sum_{|h|=2s} \Pr \left( \|X_h^\top \epsilon\| \geq n^{-1/2} \left( \sqrt{2s} + \sqrt{2\rho_+(2s, 2\mathbf{t}) \log(1/\eta)} \right) \right) \\ &\leq \binom{p}{2s} \eta. \end{aligned}$$

By taking  $\eta' = \eta \binom{p}{2s}$ , we obtain

$$\begin{aligned} \eta' &\geq \Pr \left( \|\mathbf{P}_{\Omega(2s, \infty)}(X^\top \epsilon)\| \geq n^{-1/2} \left( \sqrt{2s} + \sqrt{2\rho_+(2s, 2\mathbf{t}) \log \left( \binom{p}{2s} / \eta' \right)} \right) \right) \\ &\geq \Pr \left( \|\mathbf{P}_{\Omega(2s, \infty)}(X^\top \epsilon)\| \geq O \left( \sqrt{\frac{s \log(p) + \log 1/\eta'}{n}} \right) \right), \end{aligned}$$

where the last inequality uses the fact that  $\rho_+(2s, 2\mathbf{t})$  is bounded by a constant with high probability.

Next we consider the upper bound of  $\|\mathbf{P}_{\Omega(\infty, 2\mathbf{t})}(X^\top \epsilon)\|$ . Similarly, we have

$$\begin{aligned}
& \Pr \left( \|\mathbf{P}_{\Omega(\infty, 2\mathbf{t})}(X^\top \epsilon)\| \geq n^{-1/2} \left( \sqrt{2 \sum_{g \in \mathcal{G}} \mathbf{t}_g} + \sqrt{2\rho_+(2s, 2\mathbf{t}) \log(1/\eta)} \right) \right) \\
&= \Pr \left( \max_{|h \cap g|=2\mathbf{t}_g, \forall g \in \mathcal{G}} \|X_h^\top \epsilon\| \geq n^{-1/2} \left( \sqrt{2 \sum_{g \in \mathcal{G}} \mathbf{t}_g} + \sqrt{2\rho_+(2s, 2\mathbf{t}) \log(1/\eta)} \right) \right) \\
&\leq \sum_{|h \cap g| \leq 2\mathbf{t}_g, \forall g \in \mathcal{G}} \Pr \left( \|X_h^\top \epsilon\| \geq n^{-1/2} \left( \sqrt{2 \sum_{g \in \mathcal{G}} \mathbf{t}_g} + \sqrt{2\rho_+(2s, 2\mathbf{t}) \log(1/\eta)} \right) \right) \\
&\leq \eta \prod_{g \in \mathcal{G}} \binom{|g|}{2\mathbf{t}_g}.
\end{aligned}$$

Thus, by taking  $\eta' = \eta \prod_{g \in \mathcal{G}} \binom{|g|}{2\mathbf{t}_g}$ , we have

$$\begin{aligned}
\eta' &\geq \Pr \left( \|\mathbf{P}_{\Omega(\infty, 2\mathbf{t})}(X^\top \epsilon)\| \geq n^{-1/2} \left( \sqrt{2 \sum_{g \in \mathcal{G}} \mathbf{t}_g} + \sqrt{2\rho_+(2s, 2\mathbf{t}) \log \left( \prod_{g \in \mathcal{G}} \binom{|g|}{2\mathbf{t}_g} / \eta' \right)} \right) \right) \\
&\geq \Pr \left( \|\mathbf{P}_{\Omega(\infty, 2\mathbf{t})}(X^\top \epsilon)\| \geq n^{-1/2} \left( \sqrt{2 \sum_{g \in \mathcal{G}} \mathbf{t}_g} + \sqrt{4\rho_+(2s, 2\mathbf{t}) \sum_{g \in \mathcal{G}} \mathbf{t}_g \log |g| + 2\varphi_+(1) \log 1/\eta'} \right) \right) \\
&\geq \Pr \left( \|\mathbf{P}_{\Omega(\infty, 2\mathbf{t})}(X^\top \epsilon)\| \geq n^{-1/2} \left( \sqrt{2 \sum_{g \in \mathcal{G}} \mathbf{t}_g} + \sqrt{4\rho_+(2s, 2\mathbf{t}) \max_{g \in \mathcal{G}} \log |g| \sum_{g \in \mathcal{G}} \mathbf{t}_g + 2\varphi_+(1) \log 1/\eta'} \right) \right) \\
&\geq \Pr \left( \|\mathbf{P}_{\Omega(\infty, 2\mathbf{t})}(X^\top \epsilon)\| \geq O \left( \sqrt{\frac{\max_{g \in \mathcal{G}} \log |g| \sum_{g \in \mathcal{G}} \mathbf{t}_g + \log 1/\eta'}{n}} \right) \right).
\end{aligned}$$

Summarizing two upper bounds, we have with high probability  $(1 - 2\eta')$

$$\|\mathbf{P}_{\Omega(2s, 2\mathbf{t})}(\nabla f(\bar{\mathbf{w}}))\| \leq \min \left( O \left( \sqrt{\frac{s \log p + \log 1/\eta'}{n}} \right), O \left( \sqrt{\frac{\max_{g \in \mathcal{G}} \log |g| \sum_{g \in \mathcal{G}} \mathbf{t}_g + \log 1/\eta'}{n}} \right) \right).$$

□

**Lemma 7.** For the least square loss, assume that matrix  $X$  to be sub-Gaussian with zero mean and has independent rows or columns. If the number of samples  $n$  is more than

$$O \left( \min \left\{ s \log p, \log(\max_{g \in \mathcal{G}} |g|) \sum_{g \in \mathcal{G}} \mathbf{t}_g \right\} \right),$$

then with high probability, we have with high probability

$$\rho_+(3s, 3\mathbf{t}) \leq \frac{3}{2} \tag{11}$$

$$\rho_-(3s, 3\mathbf{t}) \geq \frac{1}{2}. \tag{12}$$

Thus,  $\alpha$  defined in (3) is less than 1 by appropriately choosing  $\eta$  (for example,  $\eta = 1/\rho_+(3s, 3\mathbf{t})$ ).

*Proof.* For the linear regression loss, we have

$$\begin{aligned}\rho_+^{1/2}(3s, 3\mathbf{t}) &\leq \frac{1}{\sqrt{n}} \max_{\mathbf{w} \in \Omega(3s, 3\mathbf{t})} \frac{\|X\mathbf{w}\|}{\|\mathbf{w}\|} = \max_{|h| \leq 3s, |h \cap g| \leq \mathbf{t}_g} \|X_h\| \\ \rho_-^{1/2}(3s, 3\mathbf{t}) &\geq \frac{1}{\sqrt{n}} \min_{\mathbf{w} \in \Omega(3s, 3\mathbf{t})} \frac{\|X\mathbf{w}\|}{\|\mathbf{w}\|} = \min_{1 \leq |h| \leq 3s, |h \cap g| \leq \mathbf{t}_g} \|X_h\|\end{aligned}$$

From the random matrix theory [35, Theorem 5.39], we have

$$\Pr \left( \|X_h\| \geq \sqrt{n} + O(\sqrt{3s}) + O\left(\sqrt{\log \frac{1}{\eta}}\right) \right) \leq O(\eta)$$

Then we have

$$\begin{aligned}&\Pr \left( \sqrt{n}\rho_+^{1/2}(3s, 3\mathbf{t}) \geq \sqrt{n} + O(\sqrt{3s}) + O\left(\sqrt{\log \frac{1}{\eta}}\right) \right) \\ &\leq \Pr \left( \max_{|h| \leq 3s, |h \cap g| \leq \mathbf{t}_g} \|X_h\| \geq \sqrt{n} + O(\sqrt{3s}) + O\left(\sqrt{\log \frac{1}{\eta}}\right) \right) \\ &\leq |\{h \mid |h| = 3s\}| \Pr \left( \|X_h\| \geq \sqrt{n} + O(\sqrt{3s}) + O\left(\sqrt{\log \frac{1}{\eta}}\right) \right) \\ &= \binom{p}{3s} \Pr \left( \|X_h\| \geq \sqrt{n} + O(\sqrt{3s}) + O\left(\sqrt{\log \frac{1}{\eta}}\right) \right) \leq O\left(\binom{p}{3s} \eta\right)\end{aligned}$$

which implies (by taking  $\eta' = \binom{p}{3s} \eta$ ):

$$\Pr \left( \sqrt{n}\rho_+^{1/2}(3s, 3\mathbf{t}) \geq \sqrt{n} + O\left(\sqrt{s \log p}\right) + O\left(\sqrt{\log \frac{1}{\eta'}}\right) \right) \leq \eta'$$

Taking  $n = O(s \log p)$ , we have  $\rho_+^{1/2}(3s, 3\mathbf{t}) \leq \sqrt{\frac{3}{2}}$  with high probability. Next, we consider it from a different perspective.

$$\begin{aligned}&\Pr \left( \sqrt{n}\rho_+^{1/2}(3s, 3\mathbf{t}) \geq \sqrt{n} + O\left(\sqrt{\sum_{g \in \mathcal{G}} \mathbf{t}_g}\right) + O\left(\sqrt{\log \frac{1}{\eta}}\right) \right) \\ &\leq \Pr \left( \sqrt{n}\rho_+^{1/2}(+\infty, 3\mathbf{t}) \geq \sqrt{n} + O\left(\sqrt{\sum_{g \in \mathcal{G}} \mathbf{t}_g}\right) + O\left(\sqrt{\log \frac{1}{\eta}}\right) \right) \\ &= \Pr \left( \max_{|h \cap g| \leq \mathbf{t}_g, g \in \mathcal{G}} \|X_h\| \geq \sqrt{n} + O\left(\sqrt{\sum_{g \in \mathcal{G}} \mathbf{t}_g}\right) + O\left(\sqrt{\log \frac{1}{\eta}}\right) \right) \\ &\leq \prod_{g \in \mathcal{G}} \binom{|g|}{\mathbf{t}_g} \Pr \left( \|X_h\| \geq \sqrt{n} + O\left(\sqrt{\sum_{g \in \mathcal{G}} \mathbf{t}_g}\right) + O\left(\sqrt{\log \frac{1}{\eta}}\right) \right) \\ &\leq \eta \prod_{g \in \mathcal{G}} \binom{|g|}{\mathbf{t}_g} \leq \eta \log \max_{g \in \mathcal{G}} |g| \sum_{g \in \mathcal{G}} \mathbf{t}_g \\ &\Rightarrow \\ &\Pr \left( \sqrt{n}\rho_+^{1/2}(3s, 3\mathbf{t}) \geq \sqrt{n} + O\left(\sqrt{\sum_{g \in \mathcal{G}} \mathbf{t}_g \log \max_{g \in \mathcal{G}} |g|}\right) + O\left(\log \frac{1}{\eta'}\right) \right) \leq \eta'\end{aligned}$$

It indicates that if  $n \geq O(\sum_{g \in \mathcal{G}} t_g \max_{g \in \mathcal{G}} |g|)$ , then we have  $\rho_+^{1/2}(3s, 3t) \leq \sqrt{\frac{3}{2}}$  with high probability as well. Similarly, we can prove  $\rho_-^{1/2}(3s, 3t) \leq \sqrt{\frac{1}{2}}$  with high probability.  $\square$

### **Proof to Theorem 3**

*Proof.* Since  $n$  is large enough as shown in (4), from Lemma 7, we have  $\alpha < 1$  and are allowed to apply Theorem 2. Since  $\Delta = 0$  for the noiseless case, we prove the theorem by letting  $\bar{\mathbf{w}}$  be  $\mathbf{w}^*$ .  $\square$

### **Proof to Theorem 4**

*Proof.* Since  $n$  is large enough as shown in (4), from Lemma 7, we have  $\alpha < 1$  and are allowed to apply Theorem 2. From Lemma 6, we obtain the upper bound for  $\Delta$ . When the number of iterations  $k$  is large enough such that  $\alpha^k \|\mathbf{w}^0 - \bar{\mathbf{w}}\|$  reduces the magnitude of  $\Delta$ , we can easily prove the error bound of  $\mathbf{w}^k$  letting  $\bar{\mathbf{w}}$  be  $\mathbf{w}^*$ . The second claim can be similarly proven by applying the second claim in Theorem 2.  $\square$
